# Supplementary material for: Case–control study of lifetime total physical activity and endometrial cancer risk
Source: Springer Nature journal article supplement (doi:10.1007/s10552-010-9538-1), 2010-03-24
Supplement: MOESM1 [file 8849872]

**Supplementary Table 1**: Odds ratios for lifetime physical activity by body mass index (*n* = 1,573), Alberta, Canada, 2002-2006

| MET-hours/  week/  year | BMI < 25 (N =432) | | | | | | MET-hours/  week/  year | BMI 25- ≤30 (N = 522) | | | | | | MET-hours/  week/  year | BMI >30 (N = 619) | | | | | |
| --- | --- | --- | --- | --- | --- | --- | --- | --- | --- | --- | --- | --- | --- | --- | --- | --- | --- | --- | --- | --- |
|  |  | Age adjusted | | Multivariable adjusteda | |  |  | Age adjusted | | Multivariable adjusted | |  |  | Age adjusted | | Multivariable adjusted | |
| Cases | Con-trols | ORb | 95% CIb | OR | 95% CI | Cases | Con-trols | OR | 95% CI | OR | 95% CI | Cases | Con-trols | OR | 95% CI | OR | 95% CI |
| 0-≤80.2 | 31 | 84 | 1.00 | - | 1.00 | - | 0-≤83.5 | 39 | 95 | 1.00 | - | 1.00 | - | 0-≤83.1 | 91 | 80 | 1.00 | - | 1.00 | - |
| >80.2-≤102.0 | 24 | 83 | 0.70 | 0.38, 1.32 | 1.01 | 0.52, 1.98 | >83.5-≤105.7 | 32 | 95 | 0.80 | 0.46, 1.39 | 0.87 | 0.49, 1.52 | >83.1-≤105.5 | 76 | 79 | 0.86 | 0.55, 1.34 | 1.16 | 0.72,1.88 |
| >102.0-≤128.1 | 22 | 84 | 0.63 | 0.33, 1.19 | 0.88 | 0.45, 1.73 | >105.7-≤127.2 | 31 | 95 | 0.76 | 0.46, 1.46 | 0.82 | 0.39, 1.36 | >105.5-≤133.7 | 77 | 80 | 0.86 | 0.55. 1.33 | 1.26 | 0.78, 2.05 |
| >128.1 | 21 | 83 | 0.56 | 0.29, 1.08 | 0.81 | 0.40, 1.62 | >127.2 | 41 | 94 | 1.00 | 0.67, 2.08 | 1.18 | 0.82, 2.52 | >133.7 | 57 | 79 | 0.65 | 0.41, 1.03 | 0.88 | 0.53,1.46 |
| *P*trend |  |  |  | 0.08 |  | 0.49 | *P*trend |  |  |  | 0.98 |  | 0.61 | *P*trend |  |  |  | 0.26 |  | 0.73 |

a Adjusted for age, waist circumference, age at menarche, hypertension, and number of pregnancies of ≥20 weeks gestation.

b OR, odds ratio, CI, confidence interval.
